# Supplementary material for: A one-step approach to green and scalable production of graphene inks for printed flexible film heaters
Source: Royal Society of Chemistry journal article supplement (doi:10.1039/d0qm00803f), 2020-12-15
Supplement: d0qm00803f1.pdf [file d0qm00803f1.pdf]

**Supplementary Information**

**A one-step approach to green and scalable production of graphene inks  
for printed flexible film heater**

Lingyun Xu<sup>a,b,c</sup>, Haopeng Wang<sup>a,b,c</sup>, Yadong Wu<sup>b,c</sup>, Zian Wang<sup>b,c</sup>, Lixin Wu<sup>b,\*</sup> and Longhui Zheng<sup>b,d,\*</sup>

<sup>a</sup> College of Chemistry and Materials Science, Fujian Normal University, Fuzhou 350007, China.

<sup>b</sup> CAS Key Laboratory of Design and Assembly of Functional Nanostructures, Fujian Key Laboratory of Nanomaterials, Fujian Institute of Research on the Structure of Matter, Chinese Academy of Sciences, Fuzhou 350002, China.

<sup>c</sup> Fujian College, University of Chinese Academy of Sciences, Fuzhou 350002, China.

<sup>d</sup> Fujian Universities and Colleges Engineering Research Center of Soft Plastic Packaging Technology for Food, Fuzhou 350300, China.

Corresponding Authors

\*E-mail: lxwu@fjirms.ac.cn (L. Wu), lhzheng@fjirms.ac.cn (L. Zheng)

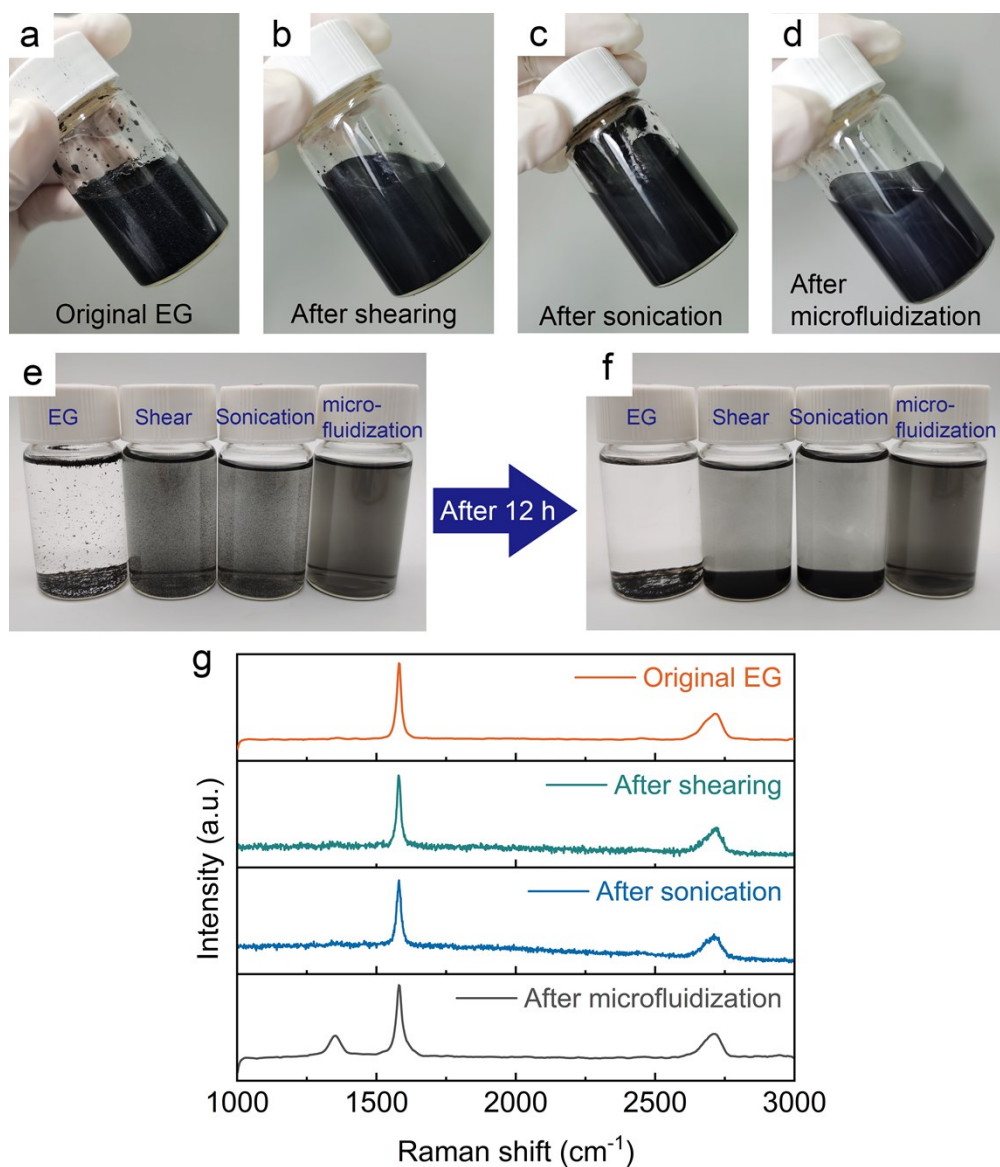

**Fig. S1.** Digital photos of the state of EG dispersions (a-d) and 100 times diluted EG dispersions (e, f) after different processing steps; Raman spectra of dried EG dispersions after different processing steps (g).

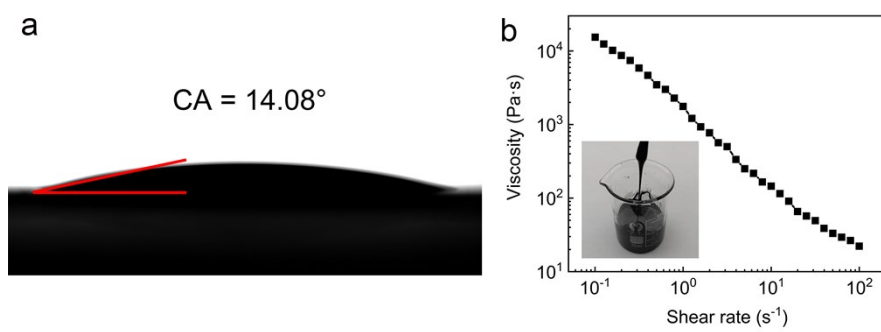

**Fig. S2.** Image of the contact angle of graphene ink on PI film (a); steady shear rheology of the condensed graphene ink (b), and the inset in (b) is the image of the condensed graphene ink.

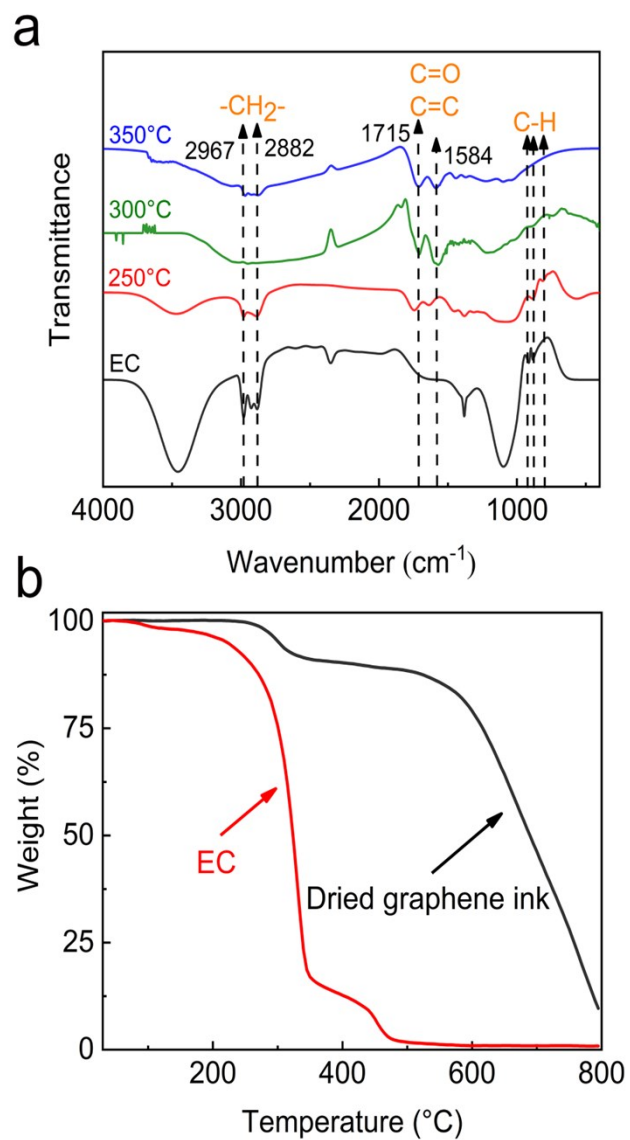

**Fig. S3.** Infrared spectra of EC and EC at different annealing temperatures (a); TGA curves of EC and the dried graphene ink (b).

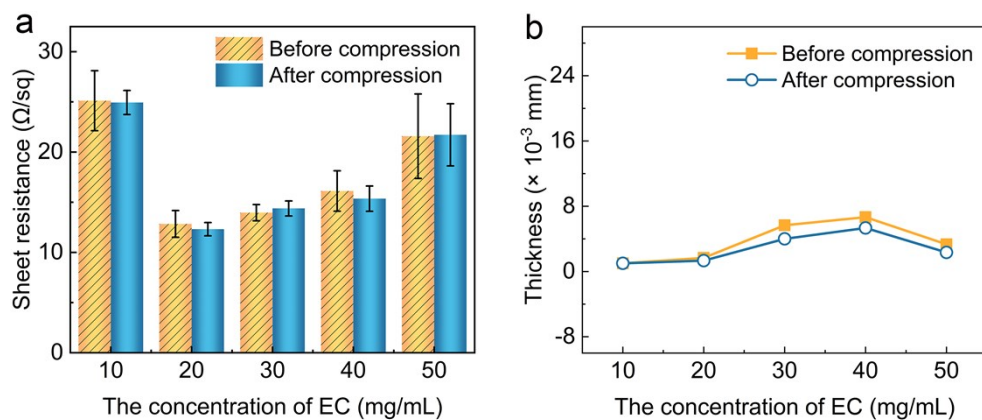

**Fig. S4** Sheet resistances (a) and thickness (b) of graphene films with different EC concentrations before and after compression.

**Table S1** Summarizing the conductivities of the graphene inks prepared by liquid-phase exfoliation in literature.

| Ink formulation                                                | Preparation method                                   | Conductivity                | Refer     |
|----------------------------------------------------------------|------------------------------------------------------|-----------------------------|-----------|
| Graphene/NMP                                                   | Tip sonication                                       | $3 \times 10^3$ S/m         | S1        |
| Graphene/EC                                                    | Sonication                                           | $1.86 \times 10^4$ S/m      | S2        |
| Graphene/CMC/SDC                                               | Microfluidization                                    | $2 \times 10^4$ S/m         | S3        |
| Graphene/EC/terpineol/ethanol                                  | Sonication                                           | $2.35 \times 10^3$ S/m      | S4        |
| Graphene/EC                                                    | Sonication                                           | $2.9 \times 10^3$ S/m       | S5        |
| Graphene/EC/cyclohexanone                                      | Ultrasound-assisted<br>supercritical CO <sub>2</sub> | $9.24 \times 10^3$ S/m      | S6        |
| Graphene/EC/cyclohexanone/terpineol                            | Shear                                                | $\sim 2.56 \times 10^4$ S/m | S7        |
| Graphene/(Hydroxypropyl) methyl<br>cellulose/2, 3-Butanediol   | Shear                                                | $3 \times 10^4$ S/m         | S8        |
| Graphene/EC                                                    | Shear                                                | $4.0 \times 10^4$ S/m       | S9        |
| Graphene/NC/lactate/octyl<br>Acetate/ethylene Glycol diacetate | Shear                                                | $4.0 \times 10^4$ S/m       | S10       |
| Graphene/EC                                                    | Microfluidization                                    | $9.7 \times 10^4$ S/m       | This work |

The symbol “~” was used to indicate the datum is an approximate value.

NMP: N-Methyl pyrrolidone.

EC: Ethyl cellulose.

CMC: Carboxymethyl cellulose.

SDC: Sodium deoxycholate.

NC: Nitrocellulose.

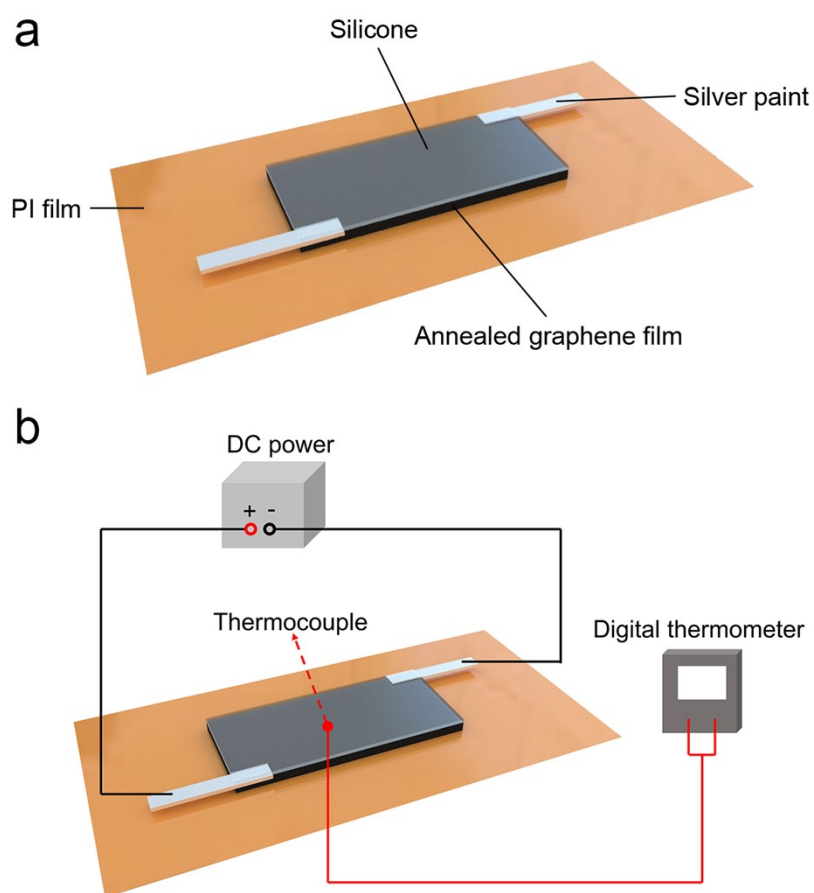

**Fig. S5.** The schematic diagrams of the structure (a) and heating system (b) of the graphene film heater.

## References

- S1. D. J. Finn, M. Lotya, G. Cunningham, R. J. Smith, D. McCloskey, J. F. Donegan and J. N. Coleman, Inkjet deposition of liquid-exfoliated graphene and MoS<sub>2</sub> nanosheets for printed device applications, *J. Mater. Chem. C*, 2014, **2**, 925-932.
- S2. W. J. Hyun, E. B. Secor, M. C. Hersam, C. D. Frisbie and L. F. Francis, High-resolution patterning of graphene by screen printing with a silicon stencil for highly flexible printed electronics, *Adv. Mater.*, 2015, **27**, 109-115.
- S3. P. G. Karagiannidis, S. A. Hodge, L. Lombardi, F. Tomarchio, N. Decorde, S. Milana, I. Goykhman, Y. Su, S. V. Mesite, D. N. Johnstone, R. K. Leary, P. A. Midgley, N. M. Pugno, F. Torrisi and A. C. Ferrari, Microfluidization of graphite and formulation of graphene-based conductive inks, *ACS Nano*, 2017, **11**, 2742-2755.
- S4. W. J. Hyun, E. B. Secor, G. A. Rojas, M. C. Hersam, L. F. Francis and C. D. Frisbie, All-printed, foldable organic thin-film transistors on glassine paper, *Adv. Mater.*, 2015, **27**, 7058-7064.
- S5. D. Song, A. Mahajan, E. B. Secor, M. C. Hersam, L. F. Francis and C. D. Frisbie, High-Resolution Transfer Printing of Graphene Lines for Fully Printed, Flexible Electronics, *ACS Nano*, 2017, **11**, 7431-7439.
- S6. Y. Gao, W. Shi, W. Wang, Y. Leng and Y. Zhao, Inkjet printing patterns of highly conductive pristine graphene on flexible substrates, *Ind. Eng. Chem. Res.*, 2014, **53**, 16777-16784.
- S7. E. B. Secor, B. Y. Ahn, T. Z. Gao, J. A. Lewis and M. C. Hersam, Rapid and versatile photonic annealing of graphene inks for flexible printed electronics, *Adv. Mater.*, 2015, **27**, 6683-6688.
- S8. S. Majee, C. Liu, B. Wu, S. L. Zhang and Z. B. Zhang, Ink-jet printed highly conductive pristine graphene patterns achieved with water-based ink and aqueous doping processing, *Carbon*, 2017, **114**,

77-83.

- S9. S. Majee, M. Song, S.-L. Zhang and Z.-B. Zhang, Scalable inkjet printing of shear-exfoliated graphene transparent conductive films, *Carbon*, 2016, **102**, 51-57.
- S10. E. B. Secor, T. Z. Gao, A. E. Islam, R. Rao, S. G. Wallace, J. Zhu, K. W. Putz, B. Maruyama and M. C. Hersam, Enhanced conductivity, adhesion, and environmental stability of printed graphene inks with nitrocellulose, *Chem. Mater.*, 2017, **29**, 2332-2340.
